# Supplementary material
Source: publisher site journal article supplement (https://www.spandidos-publications.com/2986/downloadSupplementary)

Figure S1. Elevated XRCC1, ERCC1 and ERCC2 mRNA expression in oral cancer tissues than in normal oral tissues. Increased (A) XRCC1, (B) ERCC1 and (C) ERCC2 mRNA expression in oral cancer tissues compared with in normal oral tissues reported in the Oncomine datasets. XRCC1, X-ray repair cross-complementing group 1; ERCC1/2, excision repair cross-complementing group 1/2.

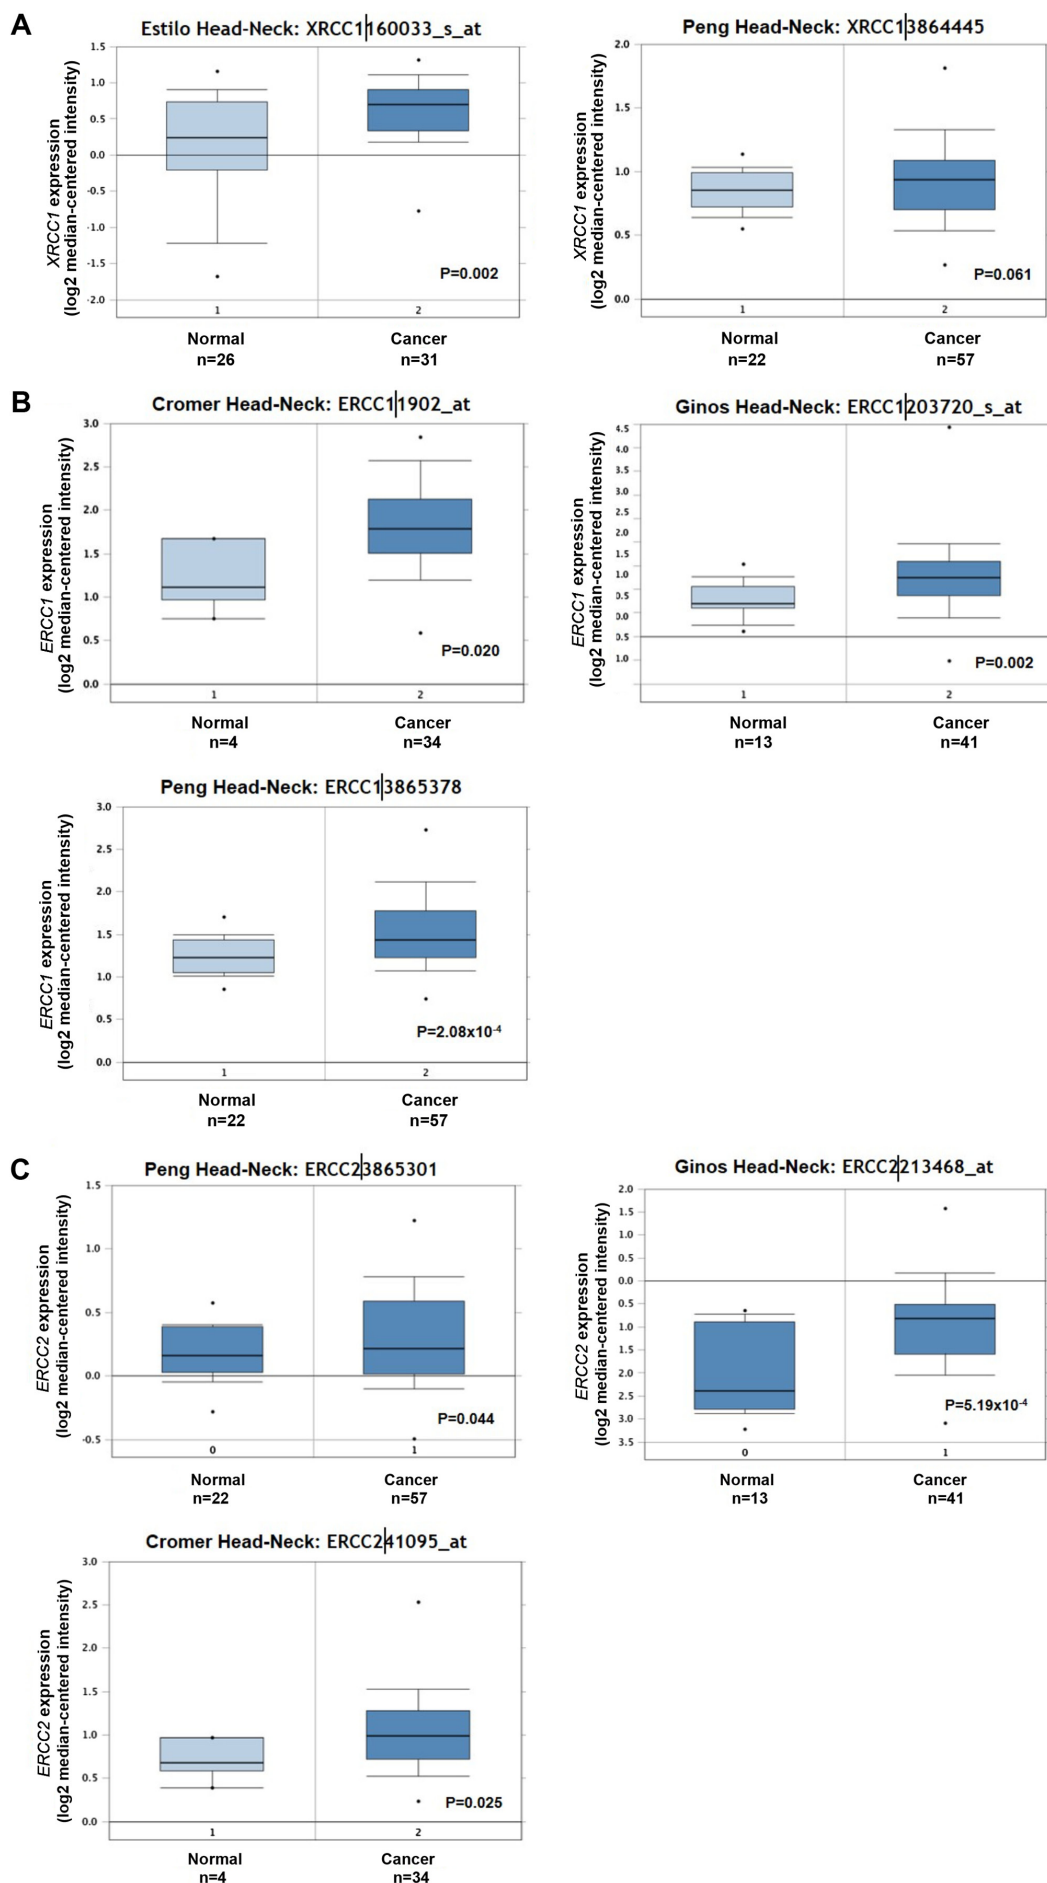

Figure S2. Negative control for immunohistochemical staining.  
Scale bar, 50  $\mu\text{m}$ .

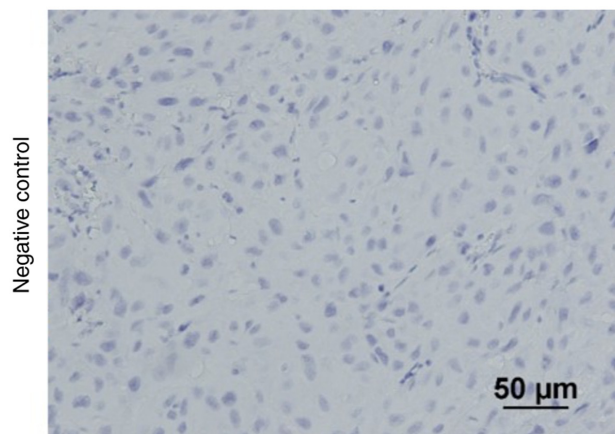

Supplement: Supplementary file 1 [file downloadSupplementary]
